# Supplementary material for: Impact of High Salt Diet on Cerebral Vascular Function and Stroke in Tff3−/−/C57BL/6N Knockout and WT (C57BL/6N) Control Mice
Source: PubMed Central journal article supplement (PMC6829871; doi:10.3390/ijms20205188), 2019-10-19
Supplement: ijms-20-05188-s001.pdf [file ijms-20-05188-s001.pdf]

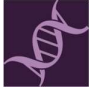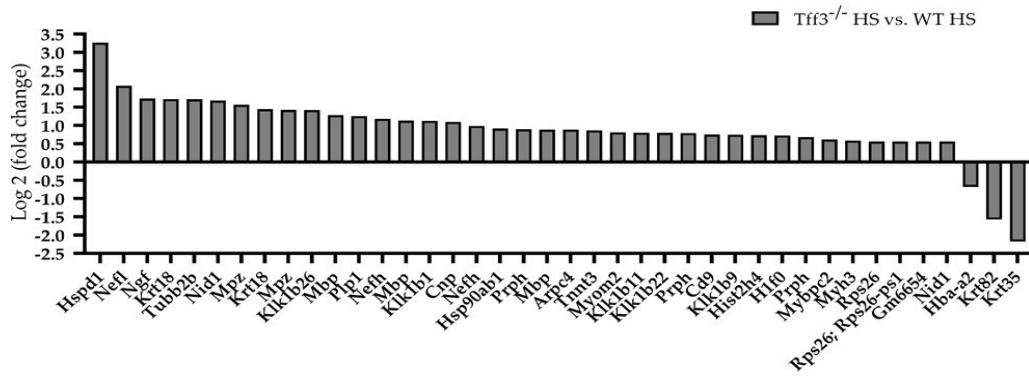

**Supplementary Figure 1.** Abundance ratio of proteins isolated from carotid arteries of *Tff3*<sup>-/-</sup> HS and WT HS mice. Data are expressed as log (2) of abundance ratio.
